# Supplementary material
Source: PubMed Central journal article supplement (PMC2906283)
Supplement: supp_M110.138982_jbc.M110.138982-1.pdf [file supp_M110.138982_jbc.M110.138982-1.pdf]

## SUPPLEMENTAL FIGURE 1S Fujimura 1S

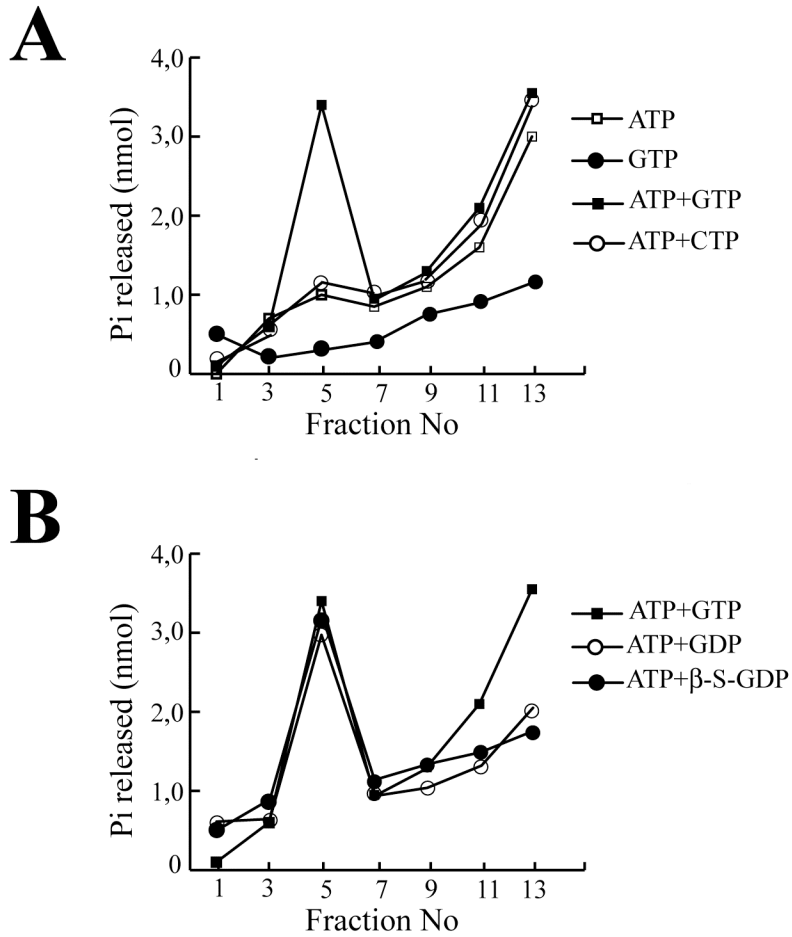

Supplemental Figure 1S. **Phosphatase activity associated with L-A virions.** The CsCl gradient fractions shown in Fig. 4A and B were incubated in a transcription buffer in which the four NTPs were replaced by the nucleotides (one or two, 0.5 mM each) indicated in the panels. After incubation for 60 min at 30 °C, the Pi released was measured by the Biomol Green Reagent (Biomol).
